# Supplementary material for: A novel two-photon fluorescent probe for detecting FA based on a coumarin derivative and its applications in living cells, zebrafish and tissues
Source: Royal Society of Chemistry journal article supplement (doi:10.1039/c9nj02352f), 2019-01-01
Supplement: c9nj02352f1.pdf [file c9nj02352f1.pdf]

*Supporting information for*

**A novel two-photon fluorescent probe for detecting FA based  
on the coumarin derivative and its applications in living cells,  
zebrafish and tissues**

Min Li, Xiuqi Kong, Baoli Dong, Nan Zhang, Wenhui Song, Yaru Lu, Weiyong Lin\*

Institute of Fluorescent Probes for Biological Imaging, School of Chemistry and Chemical  
Engineering, School of Materials Science and Engineering, University of Jinan, Jinan, Shandong  
250022, P. R. China

E-mail: [weiyonglin2013@163.com](mailto:weiyonglin2013@163.com)

## Table of contents

|               | Page |
|---------------|------|
| Fig. S1 ..... | S3   |
| Fig. S2.....  | S3   |
| Fig. S3.....  | S4   |
| Fig. S4.....  | S4   |
| Fig. S5.....  | S5   |
| Fig. S6.....  | S5   |
| Fig.S7.....   | S6   |
| Fig. S8.....  | S7   |
| Fig. S9.....  | S7   |

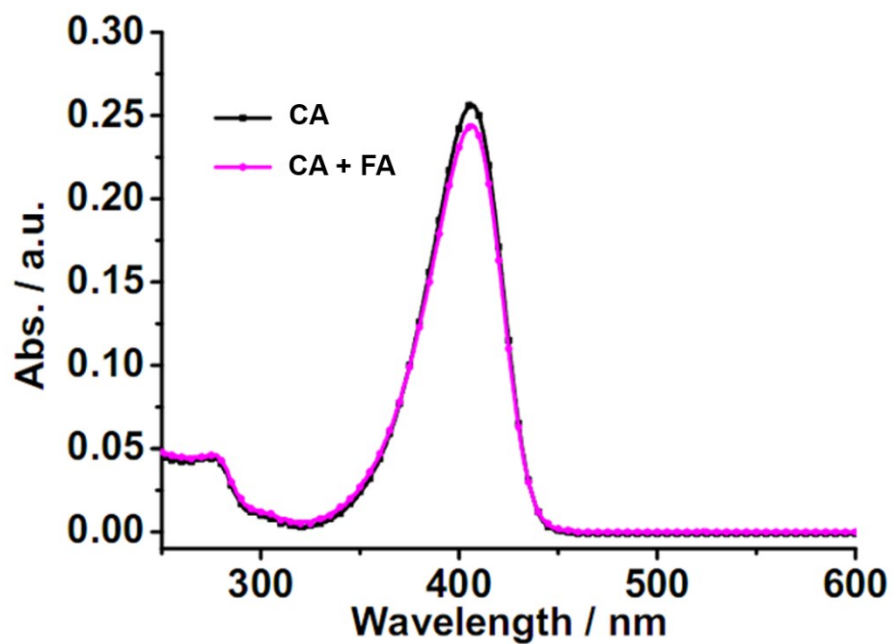

**Fig. S1.** The absorption spectra of fluorescent probe CA (10  $\mu\text{M}$ ) in the presence or absence of FA (200  $\mu\text{M}$ ).

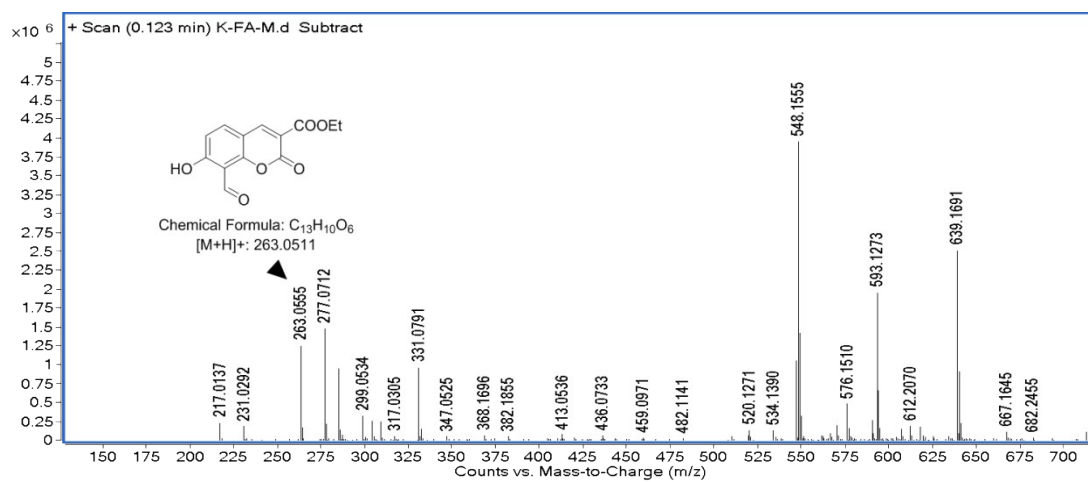

**Fig. S2.** The HRMS spectrum for reaction mixture of CA (10  $\mu\text{M}$ ) and FA (200  $\mu\text{M}$ ).

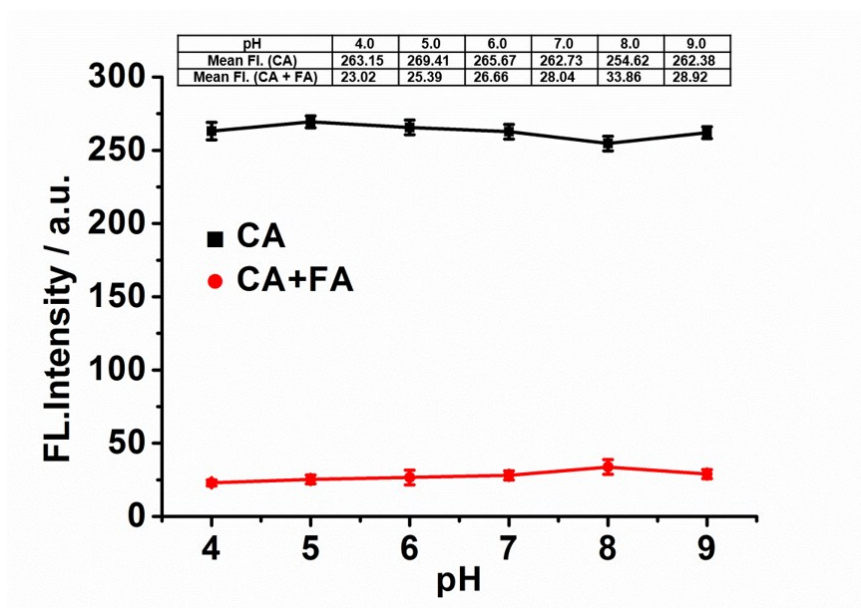

**Fig. S3.** The fluorescent intensities ( $I_{451}$ ) of CA (10  $\mu\text{M}$ ) in the presence or absence of FA (200  $\mu\text{M}$ ) under various pH (pH = 4.0 - 9.0) conditions.

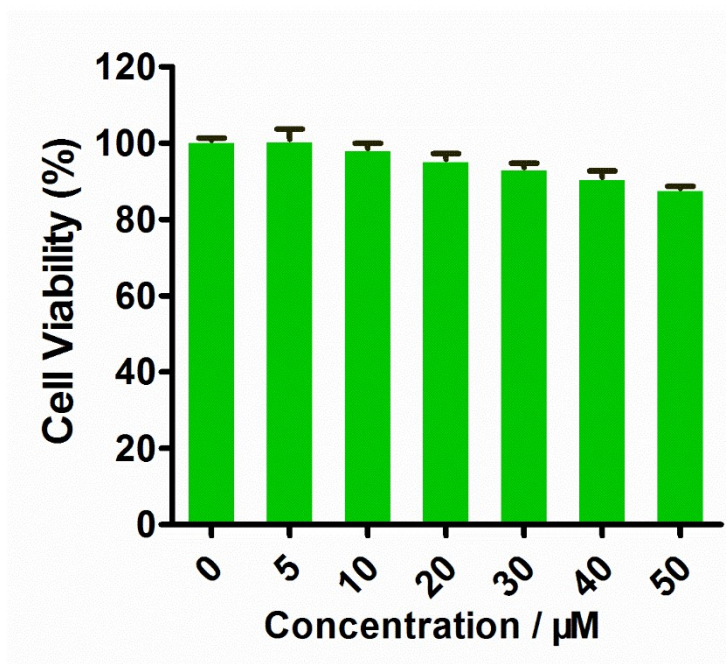

**Fig. S4.** Cell viability of HeLa cells treated with different concentrations (0 - 50  $\mu\text{M}$ ) of CA for 24 h.

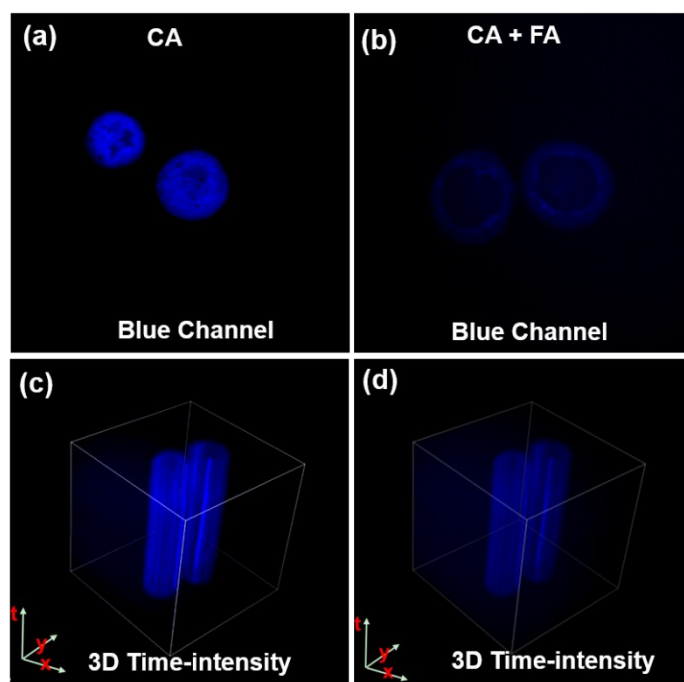

**Fig. S5.** Fluorescence images for detecting exogenous FA in HeLa cells with CA after continuous irradiation for 30 min. (a) HeLa cells incubated with 10  $\mu\text{M}$  only CA for 30 min, and then irradiation for 30 min; (b) cells were firstly incubated with 10  $\mu\text{M}$  CA for 30 min, and then treated with FA (50  $\mu\text{M}$ ) for another 30 min, followed by irradiation for 30 min. Upper row of a and b: the representative images in blue channels at 15 min with irradiation; bottom row of c and d: 3D time-dependent fluorescence images after 30 min irradiation in blue channels of a and b respectively. Blue Channel:  $\lambda_{\text{ex}} = 404 \text{ nm}$ ,  $\lambda_{\text{em}} = 425 - 475 \text{ nm}$ .

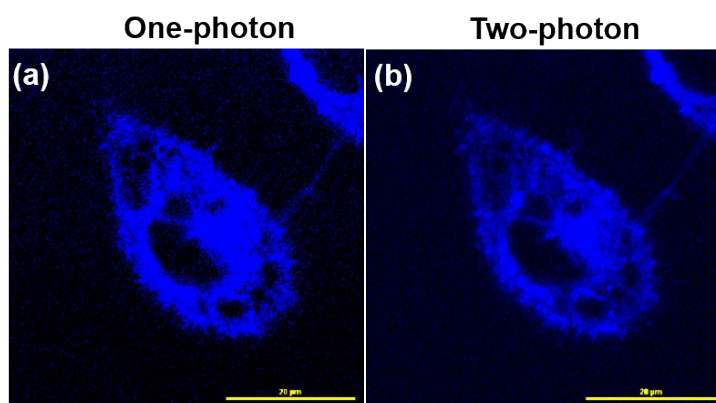

**Fig. S6.** One-photon (a) and two-photon (b) fluorescence images of HeLa cells treated with CA for 30 min. One-photon mode:  $\lambda_{\text{ex}} = 404 \text{ nm}$ ,  $\lambda_{\text{em}} = 425-475 \text{ nm}$ ; two-photon mode:  $\lambda_{\text{ex}} = 800 \text{ nm}$ ,  $\lambda_{\text{em}} = 425-475 \text{ nm}$ .

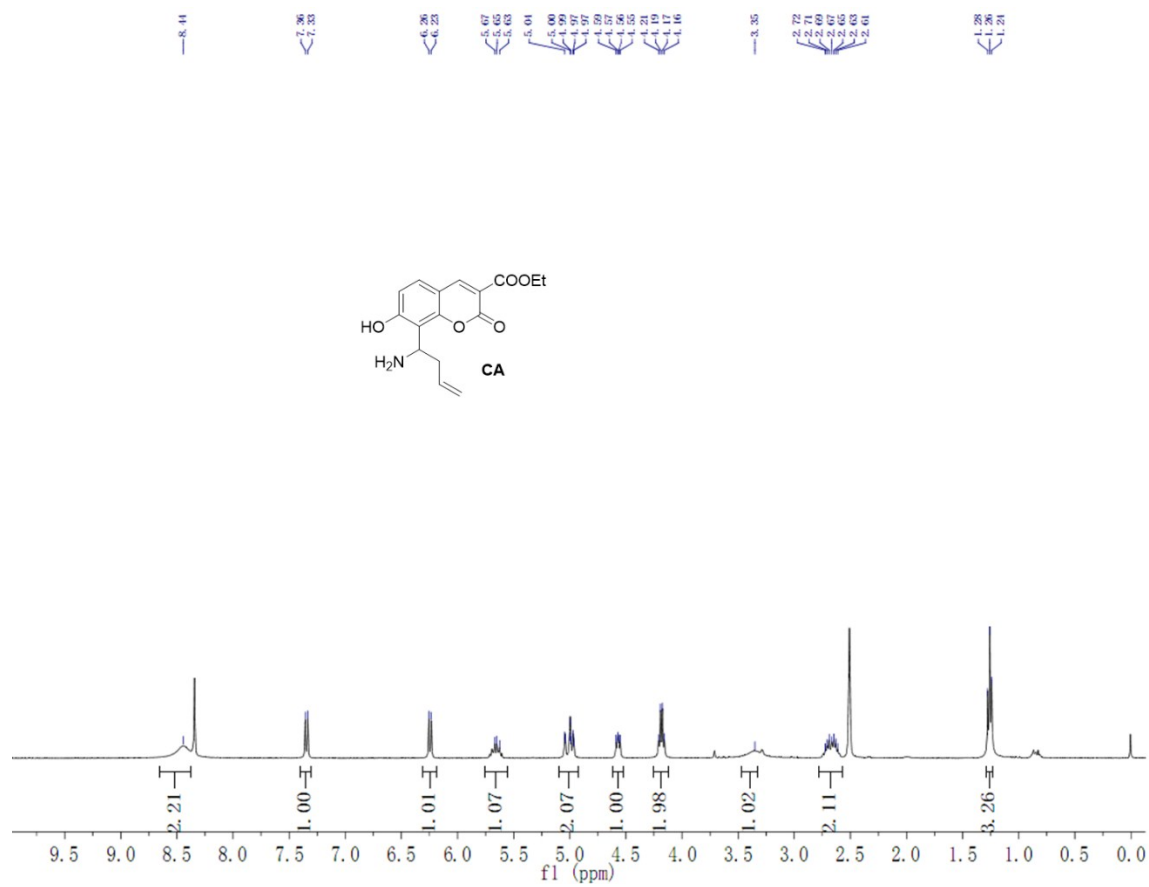

**Fig. S7.** <sup>1</sup>H NMR (100 MHz, DMSO-*d*<sub>6</sub>) spectrum of CA.

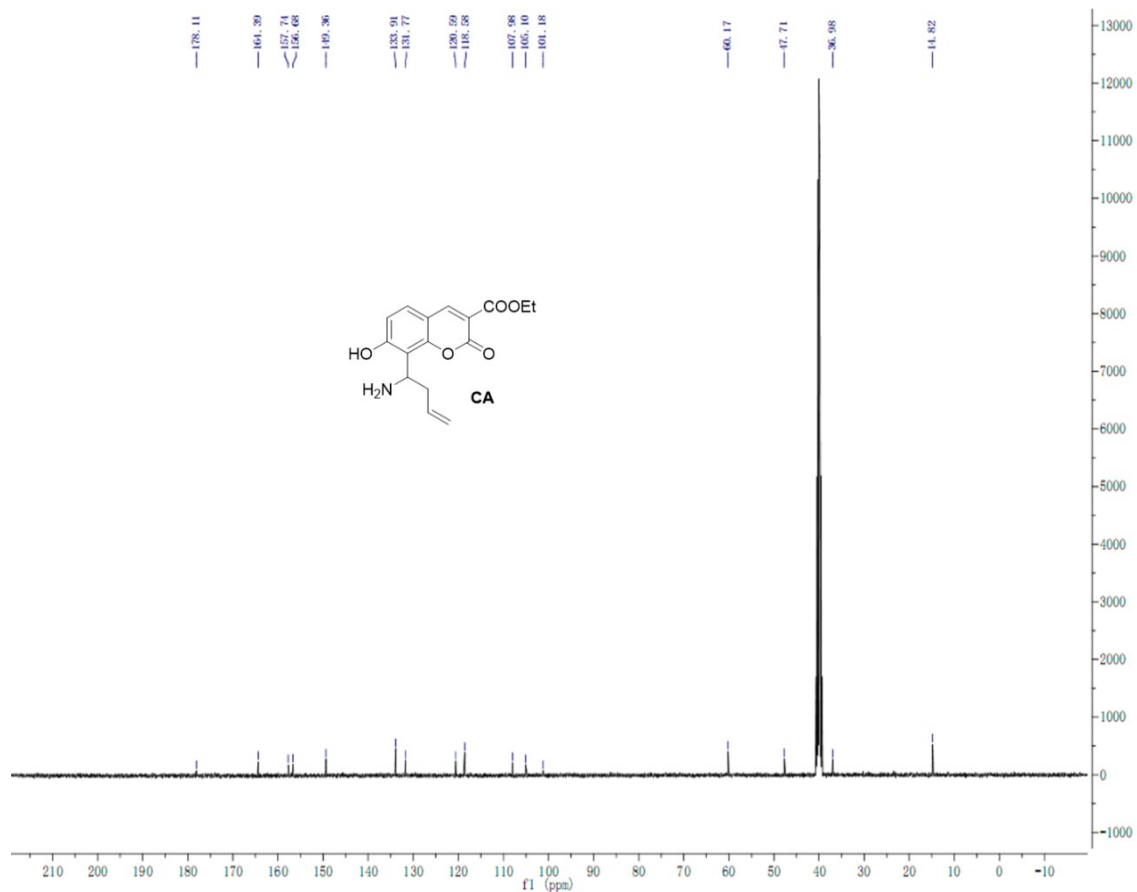

Fig. S8. <sup>13</sup>CNMR (100 MHz, DMSO-*d*<sub>6</sub>) spectrum of CA.

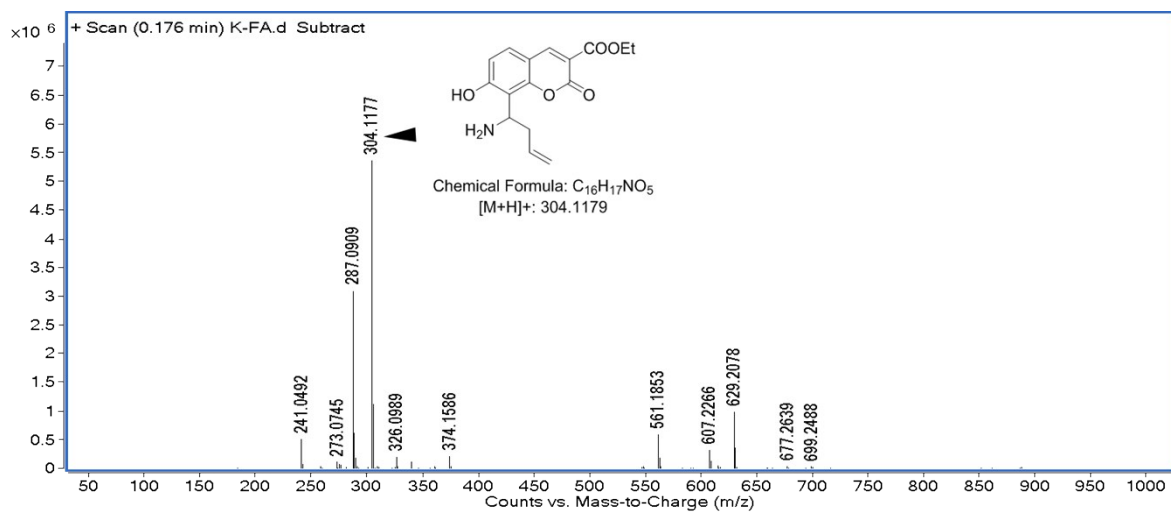

Fig. S9. HRMS spectrum of CA.
